# Supplementary material for: Non-Clinical Safety Evaluation of Intranasal Iota-Carrageenan
Source: PubMed Central journal article supplement (PMC4395440; doi:10.1371/journal.pone.0122911), 2015-04-13
Supplement: pone.0122911.s002.pdf [file pone.0122911.s002.pdf]

**S1 Table. Body Weight of Female Rabbits Before and After Intranasal Treatment with Iota-Carrageenan**

| Group           | Body Weight (kg) |              |
|-----------------|------------------|--------------|
|                 | Start of Study   | End of Study |
| Vehicle (n=4)   | 3.00 ± 0.29      | 3.03 ± 0.26  |
| Treatment (n=5) | 2.94 ± 0.17      | 2.96 ± 0.11  |

Data are means ±SD.

Vehicle = 0.5% NaCl; Treatment = 448 µg/kg/day.
