# Supplementary material for: Non-Clinical Safety Evaluation of Intranasal Iota-Carrageenan
Source: PubMed Central journal article supplement (PMC4395440; doi:10.1371/journal.pone.0122911), 2015-04-13
Supplement: pone.0122911.s003.pdf [file pone.0122911.s003.pdf]

**S2 Table. Mean Hematological Data of Female Rabbits Before and After Intranasal Treatment with Iota-Carrageenan**

| Parameter                  | Vehicle (n=4)   |                  | Treatment (n=5) |                  |
|----------------------------|-----------------|------------------|-----------------|------------------|
|                            | Prior Treatment | End of Treatment | Prior Treatment | End of Treatment |
| HB (g/dl)                  | 12.59 ± 0.46    | 11.35 ± 0.41     | 13.24 ± 0.61    | 11.01 ± 0.44     |
| HCT (%)                    | 40.13 ± 1.77    | 35.70 ± 1.27     | 41.94 ± 1.70    | 34.65 ± 1.09     |
| PLT (x10 <sup>3</sup> /μl) | 334.50 ± 60.47  | 279.88 ± 21.67   | 344.90 ± 39.29  | 348.40 ± 73.15   |
| RBC (10 <sup>6</sup> /μl)  | 6.03 ± 0.36     | 5.40 ± 0.20      | 6.24 ± 0.25     | 5.16 ± 0.12      |
| WBC (10 <sup>3</sup> /μl)  | 5.66 ± 1.38     | 4.78 ± 1.14      | 7.27 ± 0.97     | 6.19 ± 0.78      |

Data are means ±SD.

Vehicle = 0.5% NaCl; Treatment = 448 μg/kg/day.
