# Supplementary material for: Non-Clinical Safety Evaluation of Intranasal Iota-Carrageenan
Source: PubMed Central journal article supplement (PMC4395440; doi:10.1371/journal.pone.0122911), 2015-04-13
Supplement: pone.0122911.s004.pdf [file pone.0122911.s004.pdf]

**S3 Table. Mean Clinical Biochemistry Data of Female Rabbits Before and After Intranasal Treatment with Iota-Carrageenan**

| Parameter     | Vehicle (n=4)   |                  | Treatment (n=5) |                  |
|---------------|-----------------|------------------|-----------------|------------------|
|               | Prior Treatment | End of Treatment | Prior Treatment | End of Treatment |
| ALB (g/l)     | 54.45 ± 4.29    | 45.15 ± 5.07     | 52.82 ± 4.16    | 45.92 ± 4.77     |
| ALT (IU/l)    | 20.08 ± 4.47    | 20.05 ± 1.76     | 19.58 ± 2.94    | 25.66 ± 14.92    |
| ALP (IU/l)    | 71.25 ± 5.62    | 58.50 ± 10.54    | 63.80 ± 17.25   | 59.20 ± 18.62    |
| AST (IU/l)    | 9.53 ± 2.91     | 6.13 ± 0.25      | 8.06 ± 1.10     | 7.32 ± 1.34      |
| Ca (mmol/l)   | 3.49 ± 0.20     | 2.99 ± 0.23      | 3.51 ± 0.03     | 3.13 ± 0.15      |
| CHOL (mmol/l) | 1.42 ± 0.35     | 1.07 ± 0.27      | 2.01 ± 0.48     | 1.51 ± 0.39      |
| Cl (mmol/l)   | 107.58 ± 3.19   | 104.03 ± 4.25    | 107.00 ± 1.61   | 107.96 ± 4.69    |
| CREA (µmol/l) | 115.18 ± 17.03  | 75.55 ± 4.44     | 113.04 ± 22.41  | 81.86 ± 6.84     |
| GLU (mmol/l)  | 7.53 ± 0.78     | 6.87 ± 0.38      | 7.14 ± 0.50     | 6.97 ± 0.34      |
| K (mmol/l)    | 4.86 ± 0.35     | 3.86 ± 0.22      | 4.64 ± 0.21     | 4.32 ± 0.25*     |
| Na (mmol/l)   | 141.00 ± 1.15   | 136.25 ± 5.91    | 140.60 ± 1.82   | 140.60 ± 5.50    |
| TP (g/l)      | 54.93 ± 1.74    | 44.85 ± 4.28     | 55.70 ± 3.10    | 46.54 ± 3.78     |
| UREA (mmol/l) | 6.99 ± 1.00     | 6.80 ± 0.82      | 7.55 ± 0.68     | 6.80 ± 1.18      |

Data are means ±SD.

\* significantly different from respective control group,  $p < 0.05$  (student's t test).

Vehicle = 0.5% NaCl; Treatment = 448 µg/kg/day.
