# Supplementary material for: Non-Clinical Safety Evaluation of Intranasal Iota-Carrageenan
Source: PubMed Central journal article supplement (PMC4395440; doi:10.1371/journal.pone.0122911), 2015-04-13
Supplement: pone.0122911.s005.pdf [file pone.0122911.s005.pdf]

**S4 Table. Body Weight Development of Male and Female Rabbits Before and After Intranasal Treatment with Iota-Carrageenan**

| Group     | Males            |             |                                  | Females          |             |                                  |
|-----------|------------------|-------------|----------------------------------|------------------|-------------|----------------------------------|
|           | Body Weight (kg) |             | Body Weight Gain (kg (Day 0-27)) | Body Weight (kg) |             | Body Weight Gain (kg (Day 0-27)) |
|           | Day 0            | Day 27      |                                  | Day 0            | Day 27      |                                  |
| Vehicle   | 2.73 ± 0.06      | 3.50 ± 0.00 | 0.77 ± 0.06                      | 2.67 ± 0.12      | 3.67 ± 0.40 | 1.00 ± 0.36                      |
| Low Dose  | 2.40 ± 0.61      | 3.57 ± 0.15 | 1.17 ± 0.47                      | 2.80 ± 0.17      | 3.97 ± 0.15 | 1.17 ± 0.25                      |
| High Dose | 2.80 ± 0.10      | 3.60 ± 0.10 | 0.80 ± 0.17                      | 2.67 ± 0.06      | 3.50 ± 0.26 | 1.00 ± 0.26                      |

Data are means ±SD of 3 animals each per sex.

Vehicle = 0.5% NaCl; Low Dose = 112 µg/kg/day; High Dose = 448 µg/kg/day.
