# Supplementary material for: Non-Clinical Safety Evaluation of Intranasal Iota-Carrageenan
Source: PubMed Central journal article supplement (PMC4395440; doi:10.1371/journal.pone.0122911), 2015-04-13
Supplement: pone.0122911.s008.pdf [file pone.0122911.s008.pdf]

**S7 Table. Mean Hematological Data of Male and Female Rabbits After Intranasal Treatment with Iota-Carrageenan (Day 28)**

| Parameter                            | Vehicle            |                   | Low Dose            |                     | High Dose          |                    |
|--------------------------------------|--------------------|-------------------|---------------------|---------------------|--------------------|--------------------|
|                                      | M                  | F                 | M                   | F                   | M                  | F                  |
| WBC (10 <sup>3</sup> cells/ $\mu$ l) | 6.42 $\pm$ 1.93    | 4.80 $\pm$ 1.17   | 4.61 $\pm$ 2.47     | 5.57 $\pm$ 0.25     | 5.02 $\pm$ 0.47    | 5.02 $\pm$ 0.51    |
| RBC (10 <sup>6</sup> cells/ml)       | 6.42 $\pm$ 0.08    | 5.91 $\pm$ 0.38   | 6.00 $\pm$ 0.43     | 6.01 $\pm$ 0.31     | 6.31 $\pm$ 0.56    | 5.96 $\pm$ 0.13    |
| HB (g/dl)                            | 13.8 $\pm$ 0.40    | 12.33 $\pm$ 0.29  | 12.87 $\pm$ 0.64    | 12.93 $\pm$ 0.55    | 14.07 $\pm$ 1.01   | 12.27 $\pm$ 0.32   |
| HCT (%)                              | 40.13 $\pm$ 1.46   | 37.03 $\pm$ 1.59  | 39.20 $\pm$ 1.42    | 38.67 $\pm$ 1.43    | 41.00 $\pm$ 2.67   | 36.43 $\pm$ 0.86   |
| MCV (fl)                             | 62.47 $\pm$ 1.75   | 62.80 $\pm$ 1.84  | 65.53 $\pm$ 2.92    | 64.37 $\pm$ 1.08    | 65.03 $\pm$ 2.02   | 61.10 $\pm$ 1.75   |
| MCH (pg)                             | 21.47 $\pm$ 0.47   | 20.90 $\pm$ 0.90  | 21.5 $\pm$ 1.01     | 21.57 $\pm$ 0.15    | 22.33 $\pm$ 0.47   | 20.60 $\pm$ 0.75   |
| MCHC (g/dl)                          | 34.37 $\pm$ 0.21   | 33.27 $\pm$ 0.64  | 32.80* $\pm$ 0.50   | 33.5 $\pm$ 0.46     | 34.30 $\pm$ 0.40   | 33.70 $\pm$ 0.26   |
| PLT (10 <sup>3</sup> cells/ $\mu$ l) | 431 $\pm$ 59.77    | 444 $\pm$ 146.37  | 330.67 $\pm$ 113.38 | 498.67 $\pm$ 89.20  | 409.33 $\pm$ 39.25 | 448.67 $\pm$ 38.53 |
| Neut (%)                             | 16.17 $\pm$ 3.37   | 16.07 $\pm$ 1.40  | 17.80 $\pm$ 1.76    | 17.23 $\pm$ 1.36    | 17.43 $\pm$ 0.91   | 20.20 $\pm$ 9.68   |
| Lymph (%)                            | 76.10 $\pm$ 5.34   | 72.23 $\pm$ 1.53  | 72.13 $\pm$ 1.94    | 73.10 $\pm$ 3.40    | 73.33 $\pm$ 3.89   | 67.30 $\pm$ 13.55  |
| Mono (%)                             | 2.40 $\pm$ 1.30    | 2.17 $\pm$ 1.51   | 3.53 $\pm$ 0.60     | 2.93 $\pm$ 2.74     | 2.63 $\pm$ 2.06    | 3.40 $\pm$ 0.70    |
| Eosino (%)                           | 1.43 $\pm$ 0.21    | 2.53 $\pm$ 0.40   | 2.07* $\pm$ 0.32    | 1.93 $\pm$ 0.23     | 1.33 $\pm$ 0.23    | 1.73* $\pm$ 0.15   |
| Baso (%)                             | 3.77 $\pm$ 1.00    | 6.77 $\pm$ 0.92   | 4.30 $\pm$ 0.36     | 4.57 $\pm$ 0.91     | 5.13 $\pm$ 1.33    | 7.10 $\pm$ 3.03    |
| Retic (%)                            | 2.35 $\pm$ 0.12    | 2.59 $\pm$ 0.97   | 3.66 $\pm$ 1.48     | 3.00 $\pm$ 0.55     | 2.63 $\pm$ 0.61    | 2.42 $\pm$ 0.21    |
| aPTT (s)                             | 132.10 $\pm$ 36.60 | 68.13 $\pm$ 14.63 | 72.83* $\pm$ 2.77   | 106.87* $\pm$ 12.71 | 88.4 $\pm$ 19.21   | 66.50 $\pm$ 19.99  |
| PT (s)                               | 6.95 $\pm$ 0.09    | 6.75 $\pm$ 0.00   | 6.65 $\pm$ 0.09     | 6.70 $\pm$ 0.31     | 7.15 $\pm$ 0.38    | 6.75 $\pm$ 0.26    |

Data are means  $\pm$ SD of 3 animals each per sex per group.

Dunnett's test: significantly different from control group: \* p < 0.05.

Vehicle = 0.5% NaCl; Low Dose = 112  $\mu$ g/kg/day; High Dose = 448  $\mu$ g/kg/day.
