# Supplementary material for: Non-Clinical Safety Evaluation of Intranasal Iota-Carrageenan
Source: PubMed Central journal article supplement (PMC4395440; doi:10.1371/journal.pone.0122911), 2015-04-13
Supplement: pone.0122911.s009.pdf [file pone.0122911.s009.pdf]

**S8 Table. Mean Clinical Biochemistry Data of Male and Female Rabbits After Intranasal Treatment with Iota-Carrageenan (Day 28)**

| Parameter     | Vehicle        |                | Low Dose       |                | High Dose      |                 |
|---------------|----------------|----------------|----------------|----------------|----------------|-----------------|
|               | M              | F              | M              | F              | M              | F               |
| AST (IU/l)    | 13.53 ± 1.66   | 13.00 ± 2.79   | 9.40 ± 3.22    | 13.20 ± 7.76   | 11.03 ± 0.64   | 11.23 ± 2.04    |
| ALT (IU/l)    | 13.67 ± 1.37   | 27.7.0 ± 24.24 | 24.60 ± 4.16   | 24.00 ± 16.89  | 19.17 ± 6.50   | 22.60 ± 4.73    |
| AP (IU/l)     | 153.33 ± 48.54 | 94.00 ± 24.88  | 148.67 ± 1.53  | 117.67 ± 66.71 | 182.00 ± 42.93 | 162.00 ± 124.05 |
| GLU (mmol/l)  | 7.64 ± 1.00    | 6.68 ± 0.35    | 6.80 ± 0.61    | 6.65 ± 0.86    | 6.36 ± 0.45    | 5.95 ± 0.44     |
| UREA (mmol/l) | 6.26 ± 1.76    | 6.04 ± 0.70    | 5.61 ± 1.23    | 6.20 ± 0.79    | 5.62 ± 1.06    | 6.86 ± 0.74     |
| Crea (µmol/l) | 111.97 ± 6.59  | 97.70 ± 19.13  | 73.04* ± 7.14  | 86.59 ± 3.64   | 96.34 ± 17.88  | 105.30 ± 12.53  |
| Chol (mmol/l) | 0.83 ± 0.20    | 1.37 ± 0.49    | 1.14 ± 0.59    | 1.34 ± 0.25    | 0.69 ± 0.12    | 1.06 ± 0.47     |
| TP (g/l)      | 61.67 ± 5.42   | 56.67 ± 3.20   | 57.53 ± 3.47   | 55.53 ± 3.49   | 55.77 ± 1.65   | 58.37 ± 0.86    |
| Na (mmol/l)   | 149.33 ± 2.31  | 148.00 ± 1.00  | 140.67* ± 1.53 | 139.00* ± 0.00 | 148.67 ± 2.89  | 147.67 ± 1.53   |
| K (mmol/l)    | 4.56 ± 0.69    | 4.50 ± 0.78    | 4.23 ± 0.24    | 4.12 ± 0.33    | 4.05 ± 0.47    | 3.83 ± 0.17     |
| ALB (g/l)     | 64.77 ± 4.56   | 59.60 ± 4.26   | 58.60 ± 2.96   | 59.17 ± 3.39   | 58.13 ± 1.96   | 59.77 ± 2.31    |

Data are means ±SD of 5 animals each per sex.

Dunnett's test: significantly different from control group: \*  $p < 0.05$ .

Vehicle = 0.5% NaCl; Low Dose = 112 µg/kg/day; High Dose = 448 µg/kg/day.
