# Supplementary material for: Non-Clinical Safety Evaluation of Intranasal Iota-Carrageenan
Source: PubMed Central journal article supplement (PMC4395440; doi:10.1371/journal.pone.0122911), 2015-04-13
Supplement: pone.0122911.s010.pdf [file pone.0122911.s010.pdf]

**S9 Table. Histopathological Findings of Male and Female Rabbits After Intranasal Treatment with Iota-Carrageenan**

| Tissue <sup>a</sup>                                    | Vehicle |   | Low Dose |   | High Dose |   |
|--------------------------------------------------------|---------|---|----------|---|-----------|---|
|                                                        | M       | F | M        | F | M         | F |
| <b>Liver</b>                                           |         |   |          |   |           |   |
| Interstitial fibrosis, diffuse                         |         |   |          |   |           |   |
| Minimal                                                | 0       | 1 | 0        | 1 | 1         | 0 |
| Mild                                                   | 0       | 0 | 0        | 1 | 0         | 0 |
| Periportal infiltrate(s), mononuclear cell (minimal)   | 0       | 2 | 1        | 1 | 0         | 2 |
| Macrovacuolation, hepatocellular, centrilobular        |         |   |          |   |           |   |
| Minimal                                                | 1       | 0 | 0        | 0 | 0         | 0 |
| Mild                                                   | 0       | 1 | 0        | 0 | 0         | 0 |
| Congestion, diffuse                                    |         |   |          |   |           |   |
| Minimal                                                | 0       | 2 | 2        | 2 | 1         | 2 |
| Mild                                                   | 3       | 0 | 0        | 0 | 2         | 1 |
| <b>Kidney</b>                                          |         |   |          |   |           |   |
| Basophilic tubules, cortex                             |         |   |          |   |           |   |
| Minimal                                                | 1       | 2 | 0        | 0 | 1         | 0 |
| Mild                                                   | 1       | 0 | 0        | 0 | 0         | 0 |
| Infiltrate(s), mononuclear cell (minimal)              | 0       | 0 | 0        | 0 | 1         | 0 |
| Mineralized focus(i), papilla/medulla (minimal)        | 1       | 1 | 0        | 0 | 0         | 1 |
| <b>Aorta</b>                                           |         |   |          |   |           |   |
| Mineralized focus(i), media (minimal)                  | 0       | 0 | 1        | 1 | 0         | 0 |
| <b>Lung with bronchus</b>                              |         |   |          |   |           |   |
| Focus(i) of pneumonitis                                |         |   |          |   |           |   |
| Minimal                                                | 1       | 1 | 1        | 1 | 1         | 0 |
| Mild                                                   | 0       | 0 | 0        | 1 | 0         | 0 |
| Perivascular infiltrate(s), mononuclear cell (minimal) | 0       | 1 | 1        | 0 | 1         | 1 |
| Alveolar macrophages, (multi)focal                     |         |   |          |   |           |   |
| Minimal                                                | 0       | 0 | 2        | 1 | 0         | 1 |
| Mild                                                   | 0       | 1 | 0        | 0 | 0         | 0 |
| Osseous metaplasia, focal (minimal)                    | 0       | 0 | 2        | 0 | 0         | 0 |
| Alveolar edema, multifocal                             |         |   |          |   |           |   |
| Minimal                                                | 1       | 0 | 0        | 1 | 0         | 1 |
| Mild                                                   | 0       | 1 | 0        | 0 | 0         | 0 |
| Congestion, diffuse                                    |         |   |          |   |           |   |
| Minimal                                                | 1       | 0 | 0        | 1 | 1         | 0 |
| Mild                                                   | 1       | 0 | 1        | 1 | 1         | 0 |
| Moderate                                               | 1       | 0 | 0        | 1 | 1         | 1 |
| Marked                                                 | 0       | 1 | 0        | 0 | 0         | 0 |
| <b>Thymus</b>                                          |         |   |          |   |           |   |
| Atrophy / regression (minimal)                         | 1       | 0 | 0        | 0 | 1         | 0 |
| Parenchymal haemorrhage(s) (minimal)                   | 0       | 0 | 1        | 1 | 1         | 1 |
| <b>Spleen</b>                                          |         |   |          |   |           |   |
| Presence of germinal centers (minimal)                 | 1       | 0 | 0        | 0 | 2         | 0 |
| <b>Pancreas</b>                                        |         |   |          |   |           |   |
| Accessory spleen (present)                             | 1       | 0 | 0        | 1 | 0         | 0 |

| Tissue <sup>a</sup>                               | Vehicle |      | Low Dose |      | High Dose |      |
|---------------------------------------------------|---------|------|----------|------|-----------|------|
|                                                   | M       | F    | M        | F    | M         | F    |
| <b>Peyer's patch</b>                              |         |      |          |      |           |      |
| Presence of germinal centers                      |         |      |          |      |           |      |
| Mild                                              | 2       | 0    | 0        | 1    | 1         | 2    |
| Moderate                                          | 1       | 2    | 3        | 1    | 2         | 0    |
| Marked                                            | 0       | 1    | 0        | 1    | 0         | 1    |
| <b>Colon</b>                                      |         |      |          |      |           |      |
| Mucosal infiltration, mononuclear cell            |         |      |          |      |           |      |
| Minimal                                           | 0       | 0    | 1        | 0    | 0         | 0    |
| Mild                                              | 0       | 1    | 0        | 0    | 0         | 0    |
| <b>Mesenteric lymph node</b>                      |         |      |          |      |           |      |
| Presence of germinal centers                      |         |      |          |      |           |      |
| Minimal                                           | 0       | 1    | 0        | 0    | 1         | 2    |
| Mild                                              | 2       | 2    | 3        | 2    | 1         | 1    |
| Moderate                                          | 1       | 0    | 0        | 1    | 0         | 0    |
| Sinusoidal erythrocytes (minimal)                 | 0       | 0    | 0        | 1    | 0         | 0    |
| <b>Adrenal gland</b>                              |         |      |          |      |           |      |
| Cortical haemorrhage(s)                           |         |      |          |      |           |      |
| Minimal                                           | 0       | 0    | 1        | 0    | 0         | 0    |
| Mild                                              | 1       | 0    | 0        | 0    | 1         | 0    |
| Accessory cortical tissue, (multi)focal (minimal) | 0       | 0    | 1        | 1    | 0         | 0    |
| <b>Epididymis</b>                                 |         |      |          |      |           |      |
| Intraluminal cellular debris, bilateral           |         |      |          |      |           |      |
| Minimal                                           | 2       | n.a. | 0        | n.a. | 1         | n.a. |
| Mild                                              | 1       | n.a. | 1        | n.a. | 1         | n.a. |
| Moderate                                          | 0       | n.a. | 2        | n.a. | 1         | n.a. |
| Oligospermia, bilateral                           |         |      |          |      |           |      |
| Minimal                                           | 0       | n.a. | 0        | n.a. | 1         | n.a. |
| Mild                                              | 2       | n.a. | 1        | n.a. | 0         | n.a. |
| Moderate                                          | 0       | n.a. | 1        | n.a. | 0         | n.a. |
| Severe                                            | 0       | n.a. | 1        | n.a. | 0         | n.a. |
| <b>Seminal vesicle</b>                            |         |      |          |      |           |      |
| Decreased secretory content, diffuse              |         |      |          |      |           |      |
| Minimal                                           | 0       | n.a. | 0        | n.a. | 1         | n.a. |
| Mild                                              | 2       | n.a. | 2        | n.a. | 0         | n.a. |
| Moderate                                          | 0       | n.a. | 1        | n.a. | 1         | n.a. |
| Decreased secretory content, diffuse              |         |      |          |      |           |      |
| Minimal                                           | 0       | n.a. | 1        | n.a. | 1         | n.a. |
| Mild                                              | 2       | n.a. | 1        | n.a. | 0         | n.a. |
| Moderate                                          | 2       | n.a. | 3        | n.a. | 2         | n.a. |
| <b>Cervix</b>                                     |         |      |          |      |           |      |
| Subepithelial haemorrhage(s) (minimal)            | n.a.    | 1    | n.a.     | 0    | n.a.      | 0    |
| <b>Ovary</b>                                      |         |      |          |      |           |      |
| Mesothelial proliferation, multifocal             |         |      |          |      |           |      |
| Minimal                                           | n.a.    | 1    | n.a.     | 1    | n.a.      | 1    |
| Mild                                              | n.a.    | 0    | n.a.     | 0    | n.a.      | 1    |

| Tissue <sup>a</sup>                                    | Vehicle |   | Low Dose |   | High Dose |   |
|--------------------------------------------------------|---------|---|----------|---|-----------|---|
|                                                        | M       | F | M        | F | M         | F |
| <b>Oviduct</b>                                         |         |   |          |   |           |   |
| Cyst(s) (mild)                                         | n.a.    | 1 | n.a.     | 0 | n.a.      | 0 |
| <b>Thyroid gland</b>                                   |         |   |          |   |           |   |
| Infiltrate(s), mononuclear cell (minimal)              | 0       | 1 | 0        | 0 | 0         | 0 |
| Cyst(s)                                                |         |   |          |   |           |   |
| Minimal                                                | 0       | 1 | 0        | 1 | 1         | 1 |
| Mild                                                   | 2       | 1 | 3        | 2 | 2         | 2 |
| Moderate                                               | 0       | 1 | 0        | 0 | 0         | 0 |
| Ectopic thymic tissue                                  |         |   |          |   |           |   |
| Minimal                                                | 1       | 1 | 0        | 0 | 0         | 0 |
| Mild                                                   | 0       | 0 | 2        | 0 | 1         | 0 |
| Moderate                                               | 0       | 0 | 0        | 1 | 0         | 0 |
| <b>Parathyroid gland</b>                               |         |   |          |   |           |   |
| Cyst(s) (minimal)                                      | 0       | 1 | 0        | 0 | 0         | 0 |
| <b>Bone marrow, sternum</b>                            |         |   |          |   |           |   |
| Bone marrow fat                                        |         |   |          |   |           |   |
| Mild                                                   | 1       | 1 | 1        | 0 | 1         | 2 |
| Moderate                                               | 2       | 2 | 2        | 3 | 2         | 1 |
| <b>Femoral bone</b>                                    |         |   |          |   |           |   |
| Bone marrow fat                                        |         |   |          |   |           |   |
| Mild                                                   | 2       | 3 | 1        | 3 | 1         | 2 |
| Moderate                                               | 1       | 0 | 2        | 0 | 2         | 1 |
| <b>Submandibular gland</b>                             |         |   |          |   |           |   |
| Lobular atrophy/degeneration, focal (minimal)          | 0       | 1 | 0        | 0 | 0         | 0 |
| <b>Mandibular lymph node</b>                           |         |   |          |   |           |   |
| Presence of germinal centers                           |         |   |          |   |           |   |
| Minimal                                                | 1       | 3 | 0        | 1 | 0         | 3 |
| Mild                                                   | 0       | 0 | 0        | 0 | 2         | 0 |
| Sinusoidal erythrocytes                                |         |   |          |   |           |   |
| Minimal                                                | 1       | 0 | 0        | 0 | 0         | 0 |
| Mild                                                   | 0       | 1 | 0        | 0 | 0         | 0 |
| Moderate                                               | 0       | 1 | 1        | 1 | 0         | 0 |
| Cystic dilated sinusoid(s) (minimal)                   | 0       | 1 | 0        | 0 | 0         | 0 |
| Black pigment, (multi)focal (minimal)                  | 0       | 0 | 0        | 1 | 0         | 0 |
| <b>Mammary gland</b>                                   |         |   |          |   |           |   |
| Increased secretory content, diffuse                   |         |   |          |   |           |   |
| Minimal                                                | n.a.    | 0 | n.a.     | 1 | n.a.      | 2 |
| Mild                                                   | n.a.    | 1 | n.a.     | 0 | n.a.      | 0 |
| Acinar development, diffuse                            |         |   |          |   |           |   |
| Minimal                                                | n.a.    | 1 | n.a.     | 0 | n.a.      | 2 |
| Mild                                                   | n.a.    | 1 | n.a.     | 0 | n.a.      | 0 |
| <b>Eye</b>                                             |         |   |          |   |           |   |
| Conjunctival infiltrate(s), mononuclear cell (minimal) | 0       | 0 | 0        | 0 | 0         | 1 |
| Retinal rosette(s) (minimal)                           | 0       | 0 | 0        | 1 | 0         | 0 |
| <b>Harderian gland</b>                                 |         |   |          |   |           |   |

| Tissue <sup>a</sup>                          | Vehicle |     | Low Dose |   | High Dose |   |
|----------------------------------------------|---------|-----|----------|---|-----------|---|
|                                              | M       | F   | M        | F | M         | F |
| Acinar metaplasia, focal (minimal)           | 0       | 0   | 1        | 0 | 0         | 0 |
| <b>Tongue</b>                                |         |     |          |   |           |   |
| Muscular infiltrate(s), mixed cell (minimal) | 0       | 0   | 0        | 0 | 0         | 1 |
| Muscular fibrosis, (multi)focal (mild)       | 0       | 0   | 0        | 1 | 0         | 0 |
| <b>Axillary lymph node</b>                   |         |     |          |   |           |   |
| Sinusoidal erythrocytes (minimal)            | 0       | 1/2 | 0        | 1 | 0         | 0 |
| <b>Nasal cavity, left</b>                    |         |     |          |   |           |   |
| Purulent exudate (minimal)                   | 0       | 0   | 1        | 0 | 0         | 0 |
| Crust, squamous epithelium, focal (minimal)  | 0       | 0   | 0        | 0 | 1         | 0 |
| <b>Nasal cavity, right</b>                   |         |     |          |   |           |   |
| Crust, squamous epithelium, focal (minimal)  | 0       | 0   | 0        | 0 | 1         | 0 |
| <b>Nostril, left</b>                         |         |     |          |   |           |   |
| Dermatitis, (multi)focal                     |         |     |          |   |           |   |
| Minimal                                      | 2       | 1   | 2        | 0 | 3         | 1 |
| Mild                                         | 0       | 1   | 1        | 0 | 0         | 1 |
| Epidermal hyperplasia, (multi)focal          |         |     |          |   |           |   |
| Minimal                                      | 0       | 0   | 1        | 0 | 1         | 0 |
| Mild                                         | 0       | 2   | 0        | 0 | 0         | 2 |
| <b>Nostril, right</b>                        |         |     |          |   |           |   |
| Dermatitis, (multi)focal                     |         |     |          |   |           |   |
| Minimal                                      | 1       | 1   | 0        | 2 | 1         | 2 |
| Mild                                         | 0       | 1   | 1        | 0 | 0         | 0 |
| Epidermal hyperplasia, (multi)focal          |         |     |          |   |           |   |
| Minimal                                      | 0       | 0   | 1        | 1 | 1         | 0 |
| Mild                                         | 1       | 0   | 0        | 0 | 0         | 0 |

<sup>a</sup> only tissues with histopathological findings shown

Vehicle = 0.5% NaCl; Low Dose = 112 µg/kg/day; High Dose = 448 µg/kg/day.
