# Supplementary material for: Non-Clinical Safety Evaluation of Intranasal Iota-Carrageenan
Source: PubMed Central journal article supplement (PMC4395440; doi:10.1371/journal.pone.0122911), 2015-04-13
Supplement: pone.0122911.s012.pdf [file pone.0122911.s012.pdf]

**S11 Table. Food Consumption Between Days 1 and 8 of Male and Female Rats after 7-Day Inhalation of Iota-Carrageenan**

| Group     | Food Consumption (g per day) |             |
|-----------|------------------------------|-------------|
|           | Males                        | Females     |
| Vehicle   | 15.2 ± 2.06                  | 10.0 ± 0.44 |
| Low Dose  | 16.3 ± 3.04                  | 9.8 ± 0.13  |
| Mid Dose  | 15.7 ± 0.94                  | 9.7 ± 0.45  |
| High Dose | 15.9 ± 0.58                  | 9.9 ± 0.59  |

Data are means ±SD of 5 animals each per sex.

Vehicle = 0.5% NaCl; nominal iota-carrageenan doses: Low Dose = 0.12 mg/kg/day; Mid Dose = 0.35 mg/kg/day; High Dose = 1.2 mg/kg/day.
