# Supplementary material for: Non-Clinical Safety Evaluation of Intranasal Iota-Carrageenan
Source: PubMed Central journal article supplement (PMC4395440; doi:10.1371/journal.pone.0122911), 2015-04-13
Supplement: pone.0122911.s013.pdf [file pone.0122911.s013.pdf]

**S12 Table. Mean Absolute Organ Weights of Male and Female Rats after 7-Day Inhalation of Iota-Carrageenan**

| Parameter         | Vehicle      |              | Low Dose     |             | Mid Dose     |              | High Dose    |             |
|-------------------|--------------|--------------|--------------|-------------|--------------|--------------|--------------|-------------|
|                   | M            | F            | M            | F           | M            | F            | M            | F           |
| Brain (mg)        | 1826 ± 90.2  | 1696 ± 48.3  | 1842 ± 43.7  | 1711 ± 82.6 | 1853 ± 41.9  | 1679 ± 41.4  | 1831 ± 68.4  | 1718 ± 82.7 |
| Heart (mg)        | 766 ± 45.3   | 524 ± 36.2   | 765 ± 67.0   | 524 ± 47.4  | 770 ± 76.9   | 563 ± 22.0   | 752 ± 36.4   | 550 ± 45.7  |
| Testes (mg)       | 2668 ± 199.5 | n.a.         | 2670 ± 133.3 | n.a.        | 2741 ± 76.0  | n.a.         | 2772 ± 165.9 | n.a.        |
| Liver (mg)        | 4921 ± 2599  | 3597 ± 128   | 6034 ± 788   | 3639 ± 98   | 6102 ± 241   | 3583 ± 142   | 5985 ± 355   | 3554 ± 230  |
| Spleen (mg)       | 543 ± 55.2   | 369 ± 42.9   | 506 ± 28.2   | 370 ± 51.8  | 529 ± 66.6   | 394 ± 52.1   | 530 ± 67.3   | 406 ± 38.8  |
| Epididymides (mg) | 543 ± 75.8   | n.a.         | 540 ± 49.9   | n.a.        | 501 ± 58.4   | n.a.         | 527 ± 49.4   | n.a.        |
| Adrenals (mg)     | 106.6 ± 14.3 | 93.1 ± 13.63 | 94.4 ± 9.0   | 84.7 ± 6.39 | 107.1 ± 16.4 | 97.2 ± 12.58 | 105.8 ± 10.5 | 87.3 ± 3.89 |
| Kidneys (mg)      | 1483 ± 97    | 1041 ± 95.3  | 1388 ± 123   | 971 ± 68.1  | 1490 ± 163   | 1035 ± 66.8  | 1503 ± 94    | 979 ± 39.9  |
| Thymus (mg)       | 328 ± 34.8   | 208 ± 25.0   | 275 ± 15.3*  | 222 ± 39.2  | 318 ± 24.3   | 199 ± 13.0   | 336 ± 28.9   | 201 ± 19.9  |

Data are means ±SD of 5 animals each per sex;

\* significantly different from control group,  $p < 0.05$  (student's t test).

Vehicle = 0.5% NaCl; nominal iota-carrageenan doses: Low Dose = 0.12 mg/kg/day; Mid Dose = 0.35 mg/kg/day; High Dose = 1.2 mg/kg/day.
