# Supplementary material for: Non-Clinical Safety Evaluation of Intranasal Iota-Carrageenan
Source: PubMed Central journal article supplement (PMC4395440; doi:10.1371/journal.pone.0122911), 2015-04-13
Supplement: pone.0122911.s014.pdf [file pone.0122911.s014.pdf]

**S13 Table. Mean Relative Organ Weights (per g Body Weight) of Male and Female Rats after 7-Day Inhalation of Iota-Carrageenan**

| Parameter           | Vehicle      |             | Low Dose     |             | Mid Dose    |             | High Dose   |             |
|---------------------|--------------|-------------|--------------|-------------|-------------|-------------|-------------|-------------|
|                     | M            | F           | M            | F           | M           | F           | M           | F           |
| Brain (mg/g)        | 9.97 ± 0.50  | 13.2 ± 0.32 | 10.18 ± 0.37 | 13.4 ± 0.74 | 9.99 ± 0.40 | 13.2 ± 0.69 | 9.90 ± 0.24 | 13.6 ± 0.15 |
| Heart (mg/g)        | 4.18 ± 0.21  | 4.08 ± 0.27 | 4.22 ± 0.33  | 4.10 ± 0.40 | 4.14 ± 0.35 | 4.41 ± 0.23 | 4.07 ± 0.29 | 4.34 ± 0.32 |
| Testes (mg/g)       | 14.6 ± 0.96  | n.a.        | 14.7 ± 0.38  | n.a.        | 14.8 ± 0.35 | n.a.        | 15.0 ± 0.57 | n.a.        |
| Liver (mg/g)        | 27.3 ± 14.44 | 28.0 ± 0.94 | 33.3 ± 3.91  | 28.5 ± 0.93 | 32.9 ± 0.59 | 28.0 ± 0.44 | 32.3 ± 1.09 | 28.0 ± 0.97 |
| Spleen (mg/g)       | 2.97 ± 0.34  | 2.87 ± 0.28 | 2.80 ± 0.22  | 2.89 ± 0.35 | 2.85 ± 0.32 | 3.08 ± 0.36 | 2.86 ± 0.31 | 3.20 ± 0.30 |
| Epididymides (mg/g) | 2.96 ± 0.34  | n.a.        | 2.98 ± 0.25  | n.a.        | 2.70 ± 0.28 | n.a.        | 2.85 ± 0.30 | n.a.        |
| Adrenals (mg/g)     | 582 ± 82.1   | 724 ± 99.3  | 522 ± 52.0   | 665 ± 69.1  | 577 ± 84.3  | 763 ± 119.0 | 572 ± 55.3  | 690 ± 46.2  |
| Kidneys (mg/g)      | 8.09 ± 0.57  | 8.10 ± 0.68 | 7.66 ± 0.52  | 7.60 ± 0.51 | 8.02 ± 0.67 | 8.11 ± 0.64 | 8.13 ± 0.58 | 7.73 ± 0.43 |
| Thymus (mg/g)       | 1.79 ± 0.20  | 1.62 ± 0.21 | 1.52 ± 0.12  | 1.74 ± 0.32 | 1.71 ± 0.13 | 1.56 ± 0.10 | 1.81 ± 0.11 | 1.59 ± 0.19 |

Data are means ±SD of 5 animals each per sex.

Vehicle = 0.5% NaCl; nominal iota-carrageenan doses: Low Dose = 0.12 mg/kg/day; Mid Dose = 0.35 mg/kg/day; High Dose = 1.2 mg/kg/day.
