# Supplementary material for: Non-Clinical Safety Evaluation of Intranasal Iota-Carrageenan
Source: PLOS journal article supplement (doi:10.1371/journal.pone.0122911), 2015-04-13
Supplement: S6 (10.1371/journal.pone.0122911.s006) [file journal.pone.0122911.s006]

**S5 Table. Total Food and Water Consumption of Male and Female Rabbits Between Days 1 and 28 of Intranasal Treatment with Iota-Carrageenan**

| Group     | Total Food Consumption (g) |             | Total Water Consumption (g) |             |
|-----------|----------------------------|-------------|-----------------------------|-------------|
|           | Males                      | Females     | Males                       | Females     |
| Vehicle   | 5447 ± 756                 | 5575 ± 1080 | 7438 ± 1786                 | 7515 ± 1382 |
| Low Dose  | 6006 ± 447                 | 6673 ± 644  | 8202 ± 948                  | 8097 ± 1069 |
| High Dose | 5869 ± 511                 | 5823 ± 664  | 8323 ± 1978                 | 7812 ± 1074 |

Data are means ±SD of 3 animals each per sex.

Vehicle = 0.5% NaCl; Low Dose = 112 µg/kg/day; High Dose = 448 µg/kg/day.
